# Supplementary material for: Systems-wide effects of short-term feed deprivation in obese mice
Source: PubMed Central journal article supplement (PMC7952545; doi:10.1038/s41598-021-85020-z), 2021-03-11
Supplement: 41598_2021_85020_MOESM1_ESM.pdf [file 41598_2021_85020_MOESM1_ESM.pdf]

## SUPPLEMENTARY MATERIAL

### Systems-wide effects of short-term feed deprivation in obese mice

Daniel Andersen<sup>1</sup>, Henrik Munch Roager<sup>2Δ</sup>, Li Zhang<sup>2&</sup>, Janne Marie Moll<sup>1</sup>, Henrik Lauritz Frandsen<sup>2</sup>, Niels Banhos Danneskiold-Samsøe<sup>3</sup>, Axel Kornerup Hansen<sup>4</sup>, Karsten Kristiansen<sup>3,5</sup>, Tine Rask Licht<sup>2</sup>, Susanne Brix<sup>1#</sup>

<sup>1</sup>Department of Biotechnology and Biomedicine, Technical University of Denmark, DK-2800 Kgs. Lyngby, Denmark

<sup>2</sup>National Food Institute, Technical University of Denmark, DK-2800 Kgs. Lyngby, Denmark

<sup>3</sup>Laboratory of Genomics and Molecular Biomedicine, Department of Biology, University of Copenhagen, Universitetsparken 13, DK-2100 Copenhagen, Denmark

<sup>4</sup>Department of Veterinary and Animal Sciences, University of Copenhagen, 1871 Frederiksberg C, Denmark

<sup>5</sup>Institute of Metagenomics, BGI-Shenzhen, Shenzhen 518083, China

<sup>#</sup>Corresponding author: Susanne Brix, [sbp@bio.dtu.dk](mailto:sbp@bio.dtu.dk), Department of Biotechnology and Biomedicine, Technical University of Denmark

<sup>Δ</sup>Current affiliation: Department of Nutrition, Exercise and Sports, University of Copenhagen, DK-1958 Frederiksberg C, Denmark

<sup>&</sup>Current affiliation: Beijing Institute of Genomics, Chinese Academy of Sciences, Beijing, China

Running title: Systems-wide effects of short-term feed deprivation

Abbreviations: BCAA: branched-chain amino acids, BCFA: branched chain fatty acids, eWAT: epididymal adipose tissue, ILC2: innate lymphoid cell type 2, SCFA: short-chain fatty acids, UCP1: uncoupling protein 1.

## SUPPLEMENTARY METHODS

### Intestinal SCFA analysis

Frozen cecum content and fecal pellets were thawed on ice. Cecum contents (5-25 mg) were homogenized in 250  $\mu$ L methanol, 250  $\mu$ L Milli-Q water and 10  $\mu$ L internal standard (100 mM 2-ethylbutyric acid in 12% formic acid, Sigma-Aldrich, St. Louis, MO, USA) using a micro-homogenizer. Similarly, one or two fecal pellets per sample were homogenized in 1.5 mL water and 100  $\mu$ L internal standard using a bead-beater, and incubated for 10 min at room-temperature with slow shaking. Acidity of samples was adjusted to pH = 2-3 using 3M HCl. The samples were then centrifuged at 10,000 g for 10 min, and supernatants were filtered through 0.45  $\mu$ m Phenex-NY syringe filters (Phenomenex, Værløse, Denmark). External calibration was performed using standard solution mixtures of acetic acid, propionic acid, butyric acid, iso-butyric acid, valeric acid, iso-valeric acid, caproic acid and 2-ethylbutyric acid (Sigma-Aldrich) in the concentrations 10, 20, 50, 100, 250, 500 and 1,000 mM with extra acetic acid, propionic acid and butyric acid in the concentrations 2000 and 5000 mM. Aliquots (3  $\mu$ L) of each sample were injected into a HP 6890 GC system (Agilent Technologies, Santa Clara, CA, USA) with a CP-FFA WCOT fused silica capillary column (25 m x 0.53 mm i.d. coated with 1  $\mu$ m film thickness, Chrompack, EA Middelburg, The Netherlands). The carrier gas was helium at a flow rate of 20 mL/min. The initial oven temperature of 60  $^{\circ}$ C was maintained for 0.25 min, raised to 180  $^{\circ}$ C at 8  $^{\circ}$ C/min and held for 3 min, then increased to 215  $^{\circ}$ C at 20  $^{\circ}$ C/min, and finally held at 215  $^{\circ}$ C for 5 min. The temperature of the front inlet detector and the injector was 250  $^{\circ}$ C. The flow rates of hydrogen, air and helium as makeup gas were 40, 450, and 45 mL/min, respectively. The run time for each analysis was 22 min. Data handling was performed using the OpenLAB Chromatography Data System ChemStation Edition software (Rev.A.10.02). The concentration of SCFA in the samples was calculated against the individual external standards, and adjusted according to the loss of internal standard.

### Liver lipid analysis

Triglycerides and phospholipids were extracted from 200 mg liver tissue samples by mixing with 1100  $\mu$ L ice-cold methanol, three ceramic beads and 100  $\mu$ L internal standard (C19:0), followed by homogenization using a Mini-Beadbeater-96 (Biospec) for three minutes. After transfer of the homogenate to 12 mL glass tubes, 3000  $\mu$ L chloroform:methanol (2:1) was added followed by 2300  $\mu$ L chloroform with 200  $\mu$ g/mL 2,6-Di-tert-butyl-4-methylphenol. 1300  $\mu$ L 0.73 % NaCl was added and tubes were vortexed and centrifuged (5 min., 3000 rpm, 4  $^{\circ}$ C). The lower phase was transferred to a clean tube, and after evaporation of the solvent, lipids were dissolved in 250  $\mu$ L chloroform:methanol (2:1) and stored at -20  $^{\circ}$ C until analysis.

For fractionation, the aminopropyl cartridges (Phenomenex Strata NH2, 500mg) were washed twice with 1 mL chloroform:methanol (2:1), dried, and then washed with 2x1000  $\mu$ L hexane. The lipid extracts were dried down, dissolved in 200  $\mu$ L chloroform, and then added to the cartridge. After elution of cholesterol esters with 2 times 2.5 mL hexane (fraction 1), triglycerides were eluted using 2 times 2.5 mL hexane:chloroform:ethylacetate (100:5:5) (fraction 2), then cholesterol, diacylglycerols and ceramide (fraction 3) using three times 2.0 mL chloroform:methanol (23:1), free fatty acids (fraction 4) with 5 mL 2% acetic acid in diethylether, and, finally, phospholipids (fraction 5) with 5 mL methanol. Fractions were dried using nitrogen and triglycerides redissolved in 200  $\mu$ L heptane, and phospholipids redissolved in 400  $\mu$ L chloroform:methanol (2:1). To produce fatty acid methyl esters, lipids were then redissolved in 0.5 M NaOH and refluxed for five minutes at 80  $^{\circ}$ C in a block heater, and then cooled to room temperature in a water bath. Methylation was obtained using 20 % BF<sub>3</sub> in methanol as methylation reagent and 0.1 % hydroquinone in methanol was added for antioxidative purposes. The samples were once again refluxed (two minutes at 80  $^{\circ}$ C) and cooled down to room temperature. To each sample, 0.73 % NaCl solution was added, followed by thorough vortexing. Heptane was added and the samples were vortexed and centrifuged for one minute at 4000 rpm. The heptane phase was transferred to a 3 mL methylation glass tube. Finally, heptane was added and the centrifugation and transfer process repeated. The lower phase and remaining upper phase, if any, was discarded. Saturated alkaline NaCl-solution (approximately 40 g NaCl and 150 mg K<sub>2</sub>CO<sub>3</sub> per 100 mL) was added to the collected heptane phases, followed by vortexing and centrifugation for one minute at 4000 rpm. The resulting heptane phase was transferred to GC vials. The phospholipids and triglycerides were separated on a 60 m SP-2380 column (Sigma-Aldrich, Brøndby, DK) using a HP 6890 GC system (Agilent Technologies, Santa Clara, CA, USA) in split mode using Helium as carrier-gas. A split-ratio of 1:10 was used and 5  $\mu$ L of sample was injected. The temperature started at 50  $^{\circ}$ C for three minutes, and was raised to 160  $^{\circ}$ C with 15  $^{\circ}$ C/min. From here the temperature was raised to 182  $^{\circ}$ C with 1  $^{\circ}$ C/min. Again the temperature was raised, this time by 10  $^{\circ}$ C/min until 200  $^{\circ}$ C/min was reached, which was held for 15 minutes. Finally, the temperature was raised by 30.0  $^{\circ}$ C/min until the final temperature of 225  $^{\circ}$ C was reached and then held for 12 minutes before resetting of the system to the initial temperature.

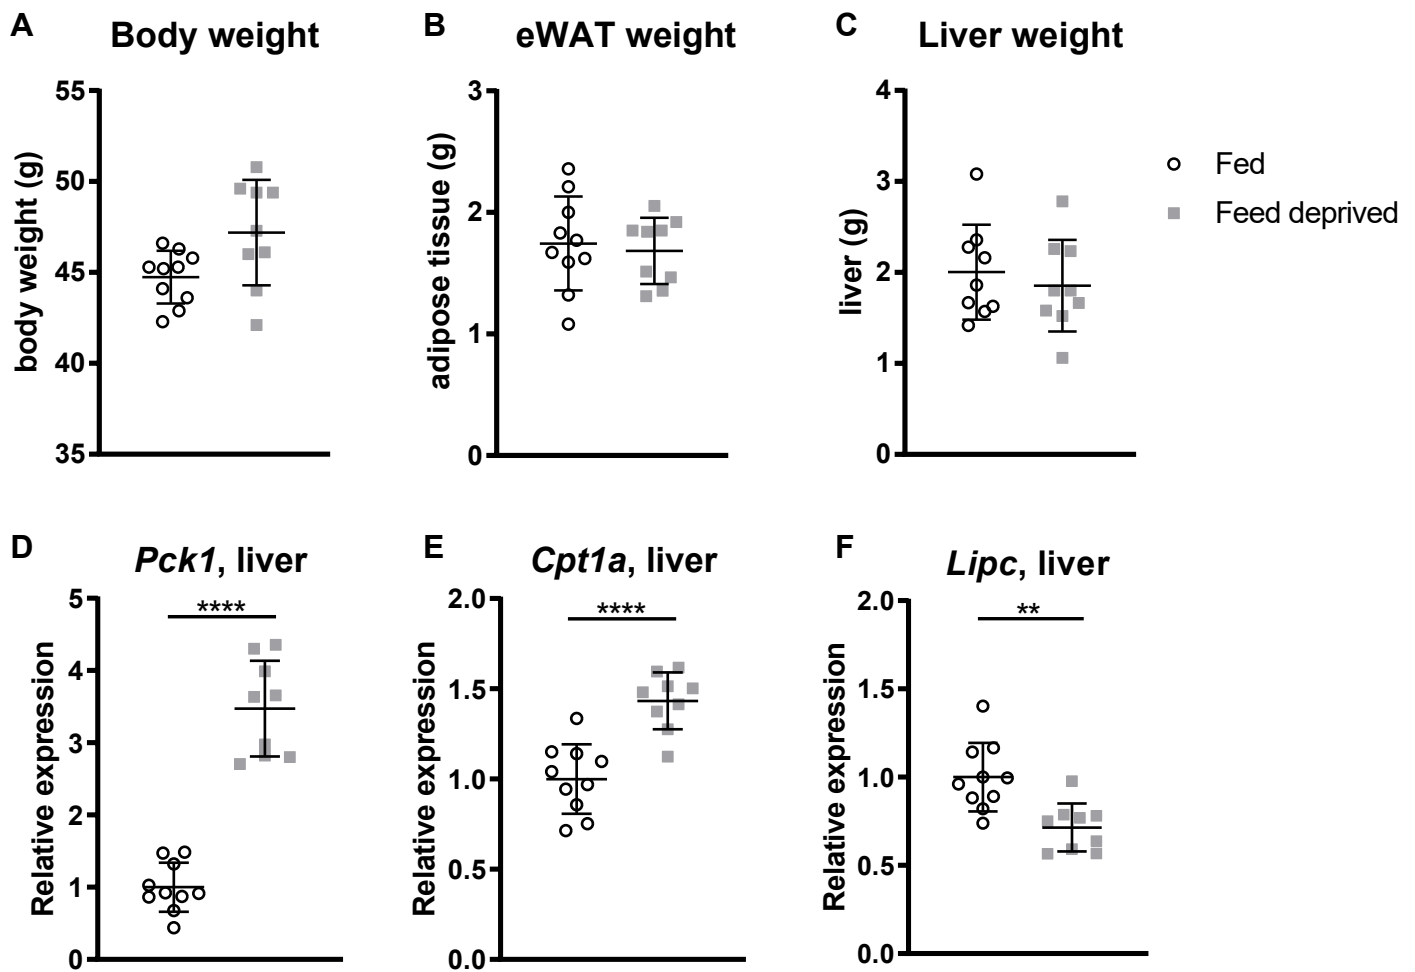

**Figure S1. Body and tissue weights at study termination.**

C57BL/6J mice were fed a high-fat diet for 22 weeks. Before sacrifice, nine mice were subjected to feed deprivation for 8 hours and 16 minutes to 11 hours and 32 minutes, while the remaining ten mice were provided ad libitum access to feed throughout the study period. A. Whole body weight prior to feed deprivation. B. Epididymal adipose tissue weight, and C, liver weight registered after termination. D-F. Liver markers used to define feed deprivation status, as assessed based on gene expression. Asterisks mark the statistically significant differences in the relative expression between fed and feed deprived mice (t test; \*\*, p-value < 0.01; \*\*\*\*, p-value < 0.0001). Fed mice (white, open circles), n=10; feed deprived mice (grey squares), n= 9, error bars display the mean and standard deviation.

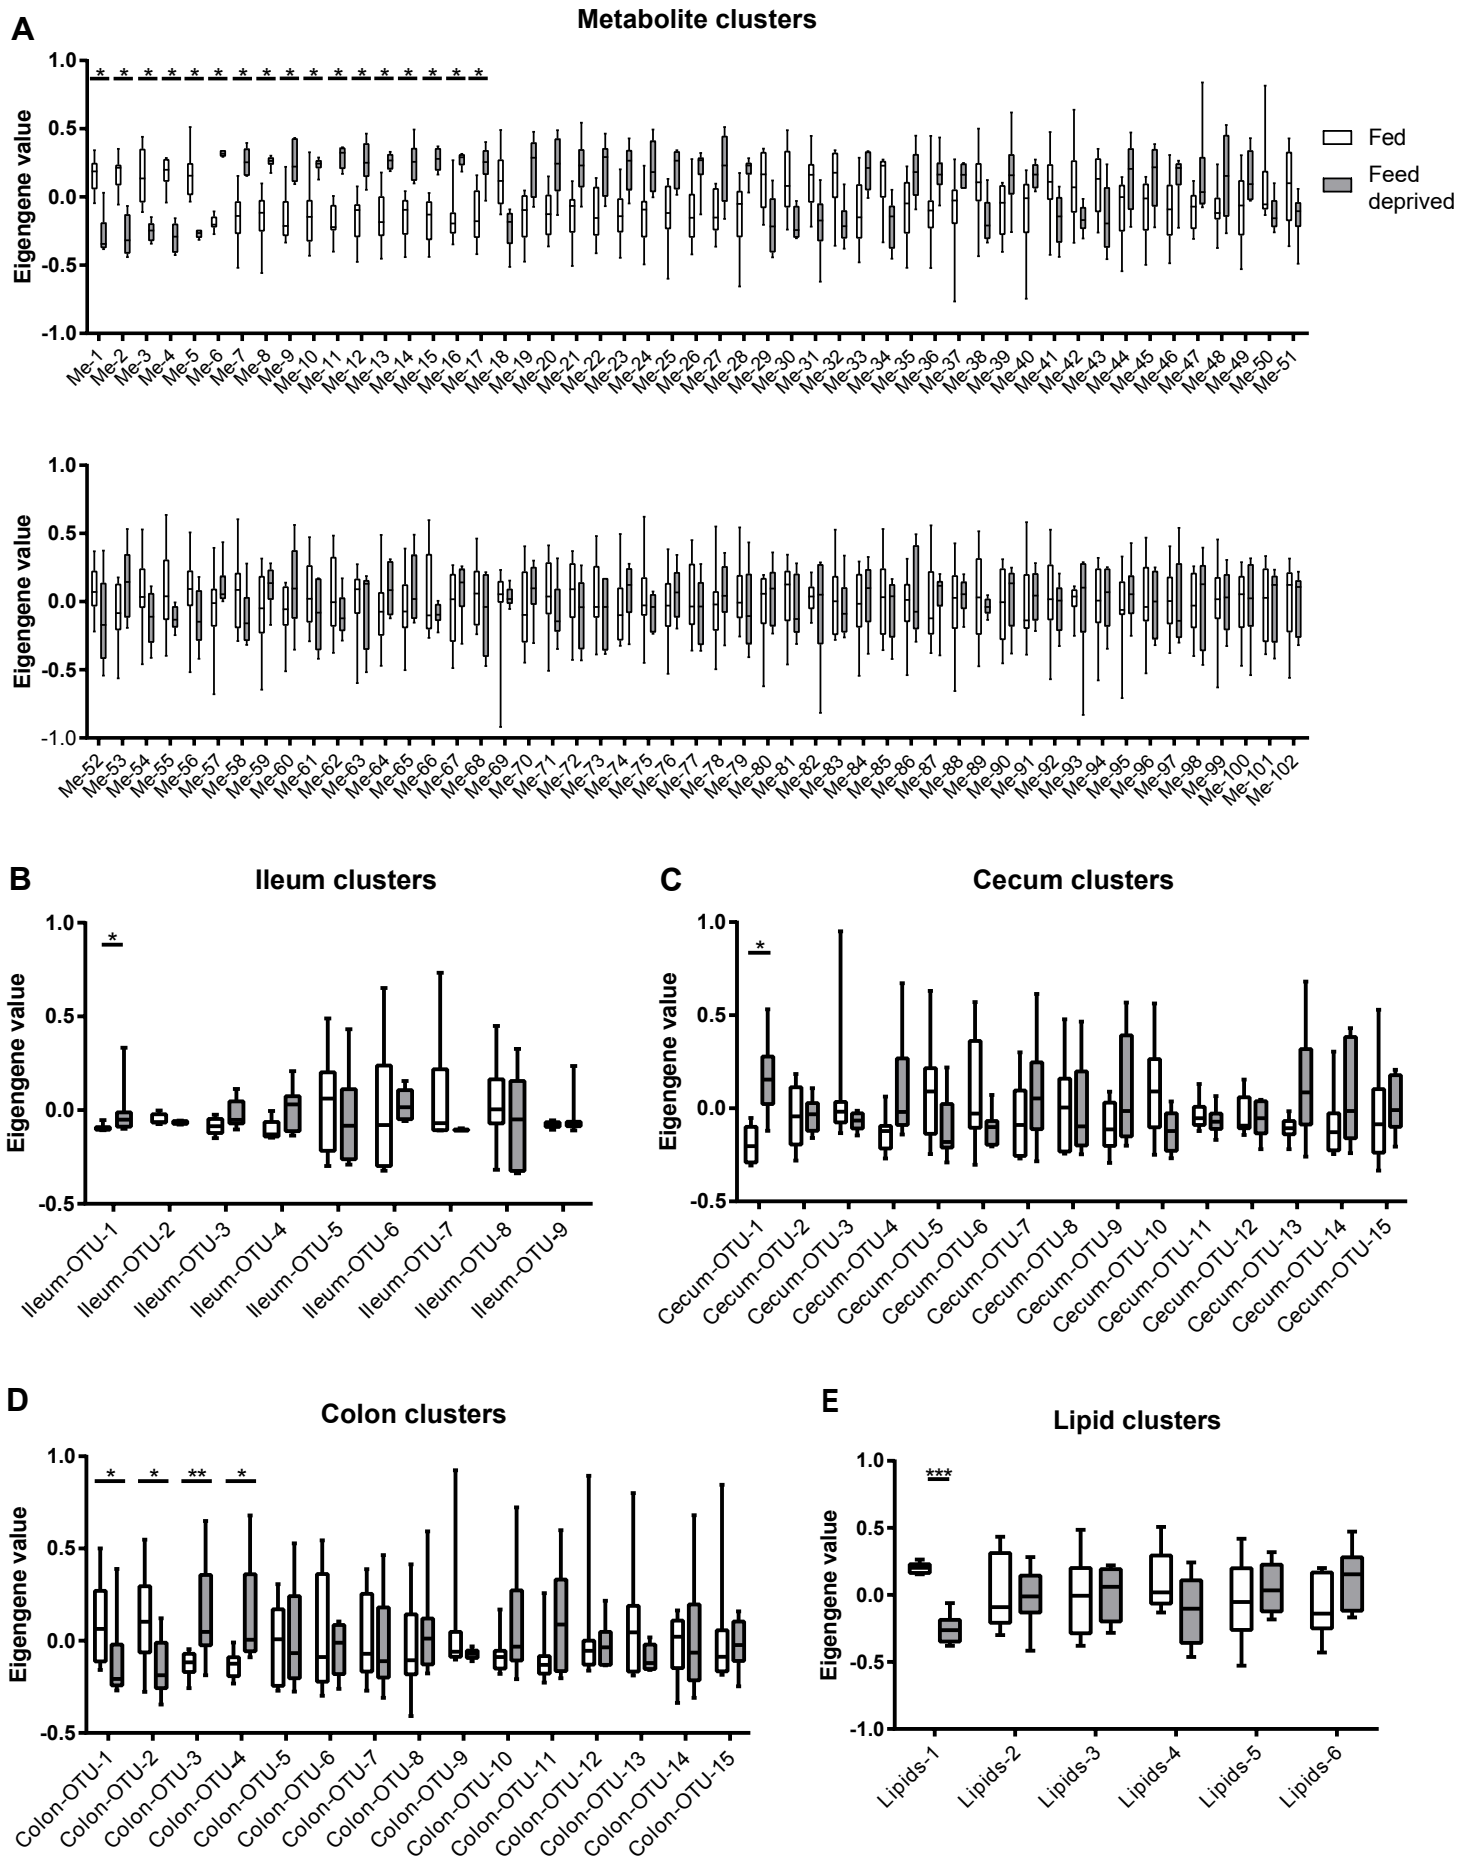

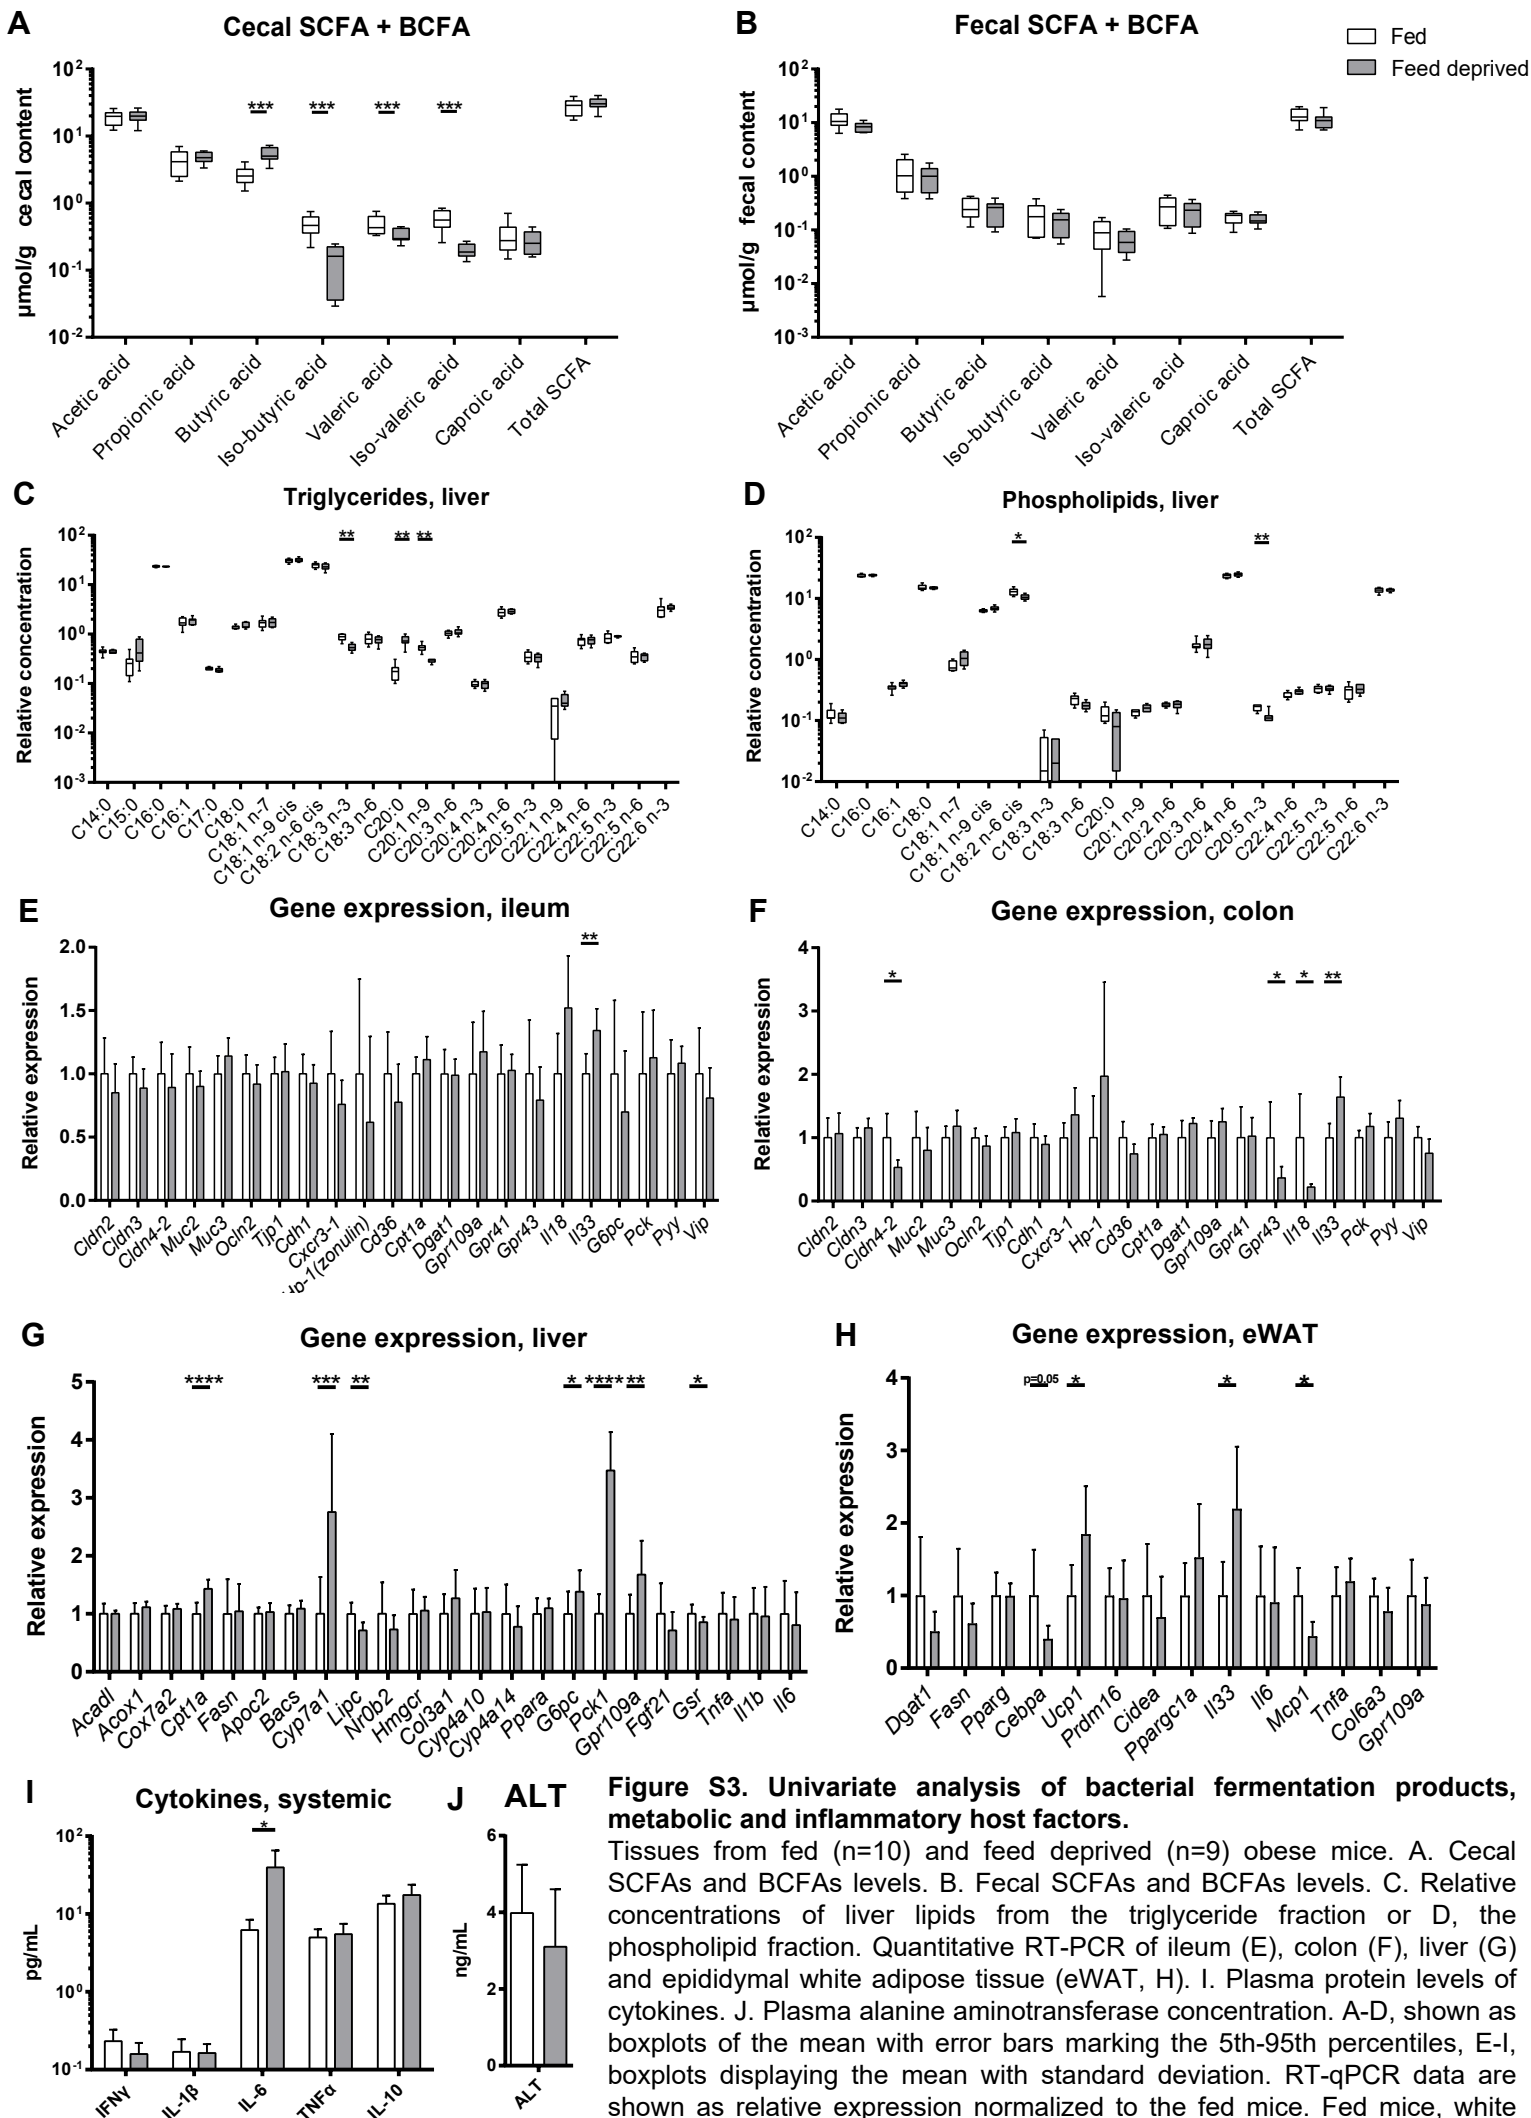

**Figure S3. Univariate analysis of bacterial fermentation products, metabolic and inflammatory host factors.**

Tissues from fed ( $n=10$ ) and feed deprived ( $n=9$ ) obese mice. A. Cecal SCFAs and BCFAs levels. B. Fecal SCFAs and BCFAs levels. C. Relative concentrations of liver lipids from the triglyceride fraction or D, the phospholipid fraction. Quantitative RT-PCR of ileum (E), colon (F), liver (G) and epididymal white adipose tissue (eWAT, H). I. Plasma protein levels of cytokines. J. Plasma alanine aminotransferase concentration. A-D, shown as boxplots of the mean with error bars marking the 5th-95th percentiles, E-I, boxplots displaying the mean with standard deviation. RT-qPCR data are shown as relative expression normalized to the fed mice. Fed mice, white boxes; feed deprived mice, grey boxes. For all statistics: t test; \*, FDR < 0.05; \*\*, FDR < 0.01; \*\*\*, FDR < 0.001; \*\*\*\*, FDR < 0.0001.

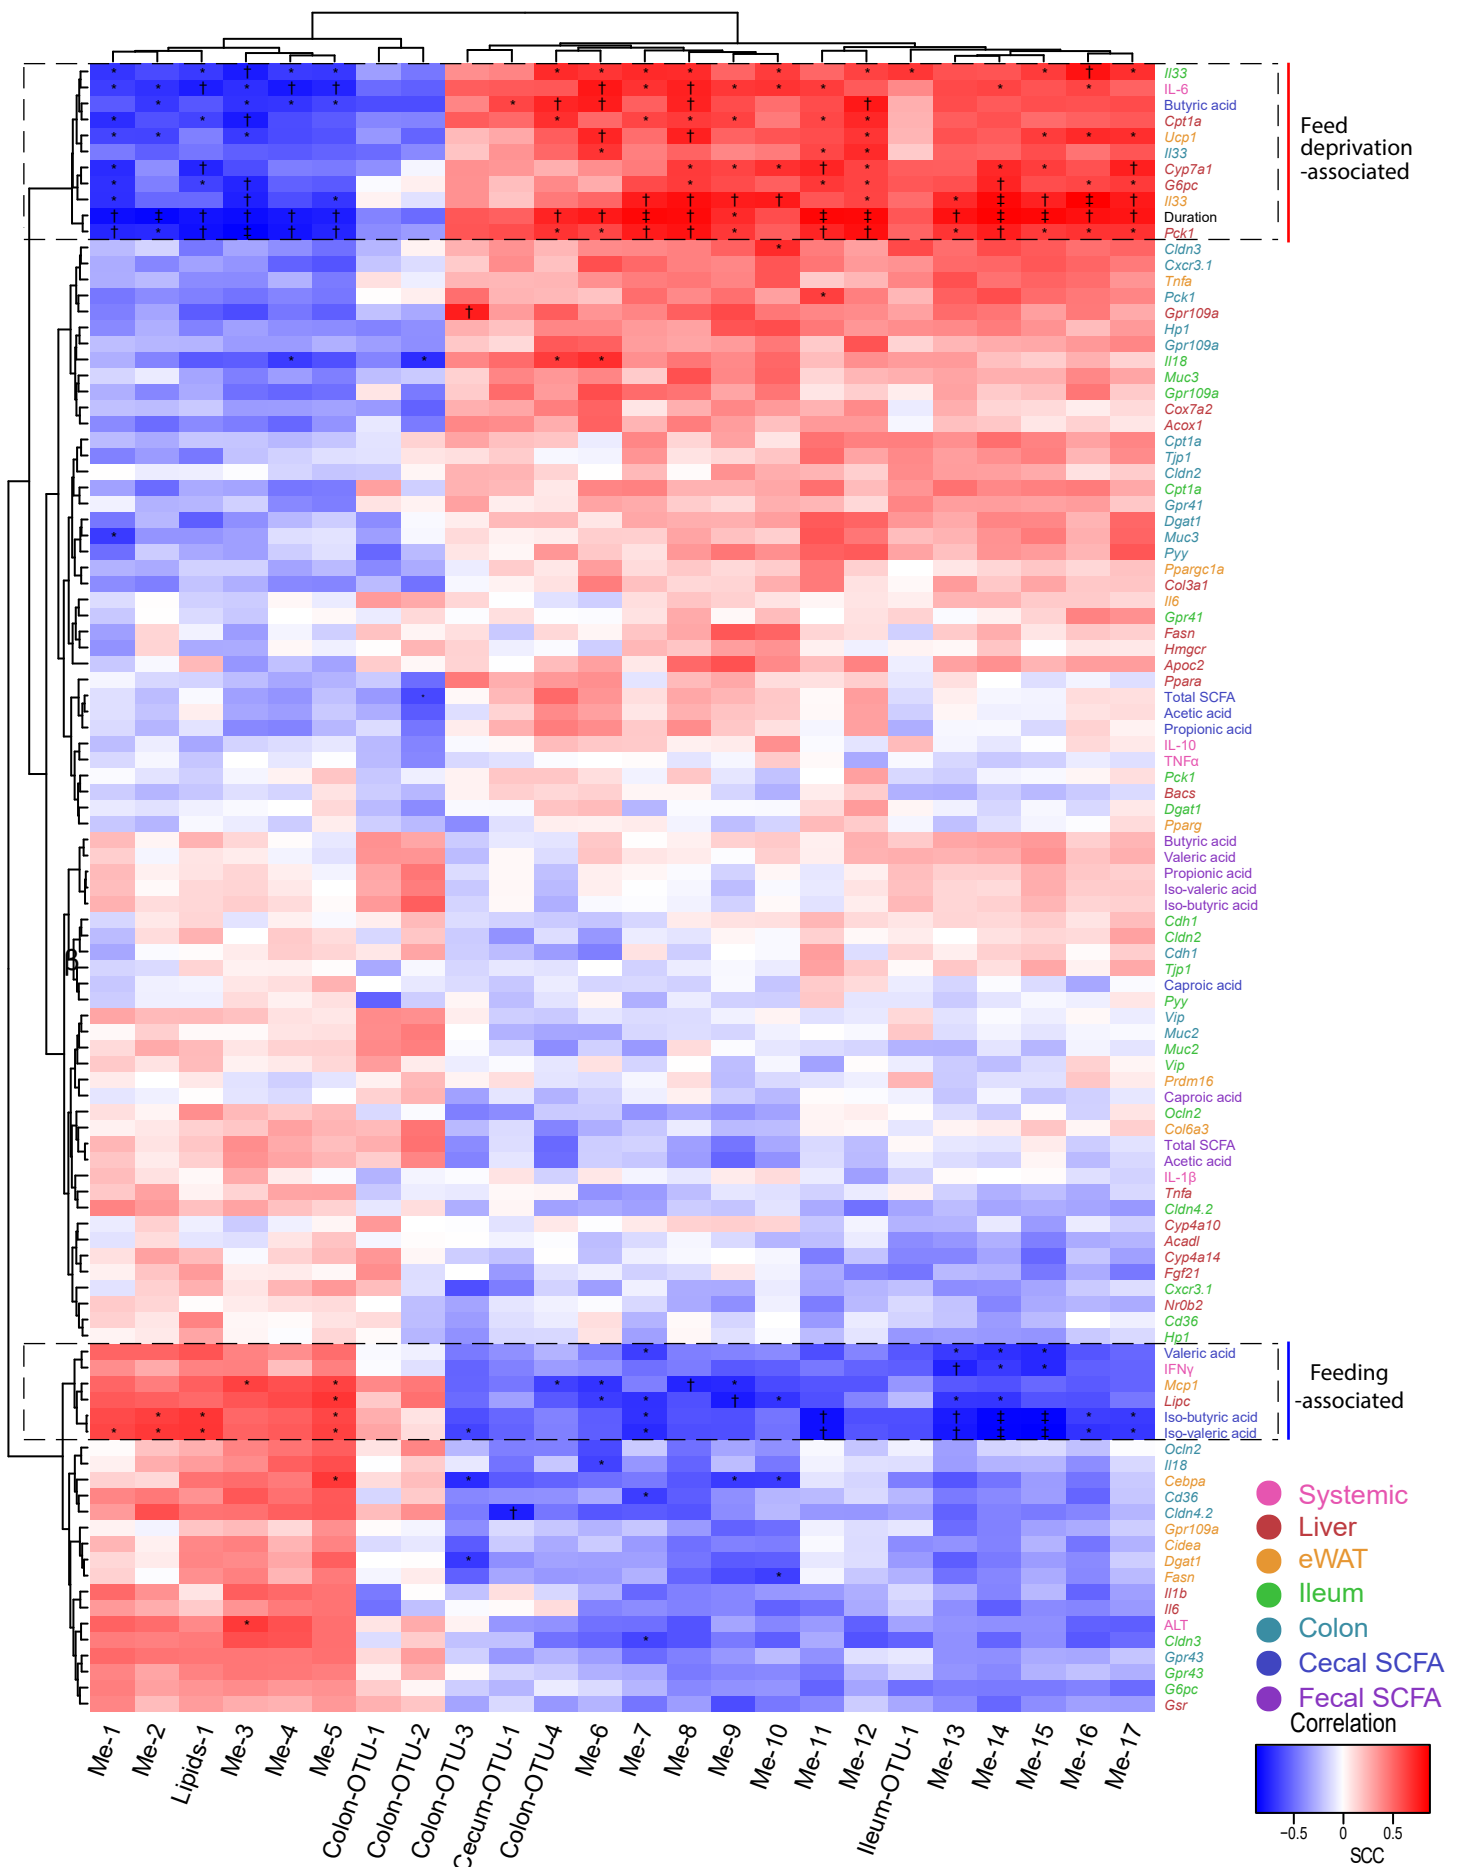

**Figure S4. Integration of host parameters and bacterial fermentation products with the feed deprivation-dependent gut microbiota, liver lipid and urine metabolite clusters.**

Correlation heatmap of hierarchically clustered, z-score-normalized host parameters (y-axis) against the eigengenes of feed deprivation-dependent lipid, metabolite and OTU clusters (x-axis). Duration of feed deprivation is included as a host parameter (8 hours and 16 minutes to 11 hours and 32 minutes for individual feed deprived mice). The coloring of host parameters corresponds to tissue origin as indicated in the legend. Heatmap color represents Spearman's rho-values (red, positive SCC; blue, negative SCC). Asterisks mark FDR-adjusted significant correlations (\*, FDR < 0.05; †, FDR < 0.01; ‡, FDR < 0.001). The dotted line indicates the major host factors associated with duration of feed deprivation, as shown in figure 1.

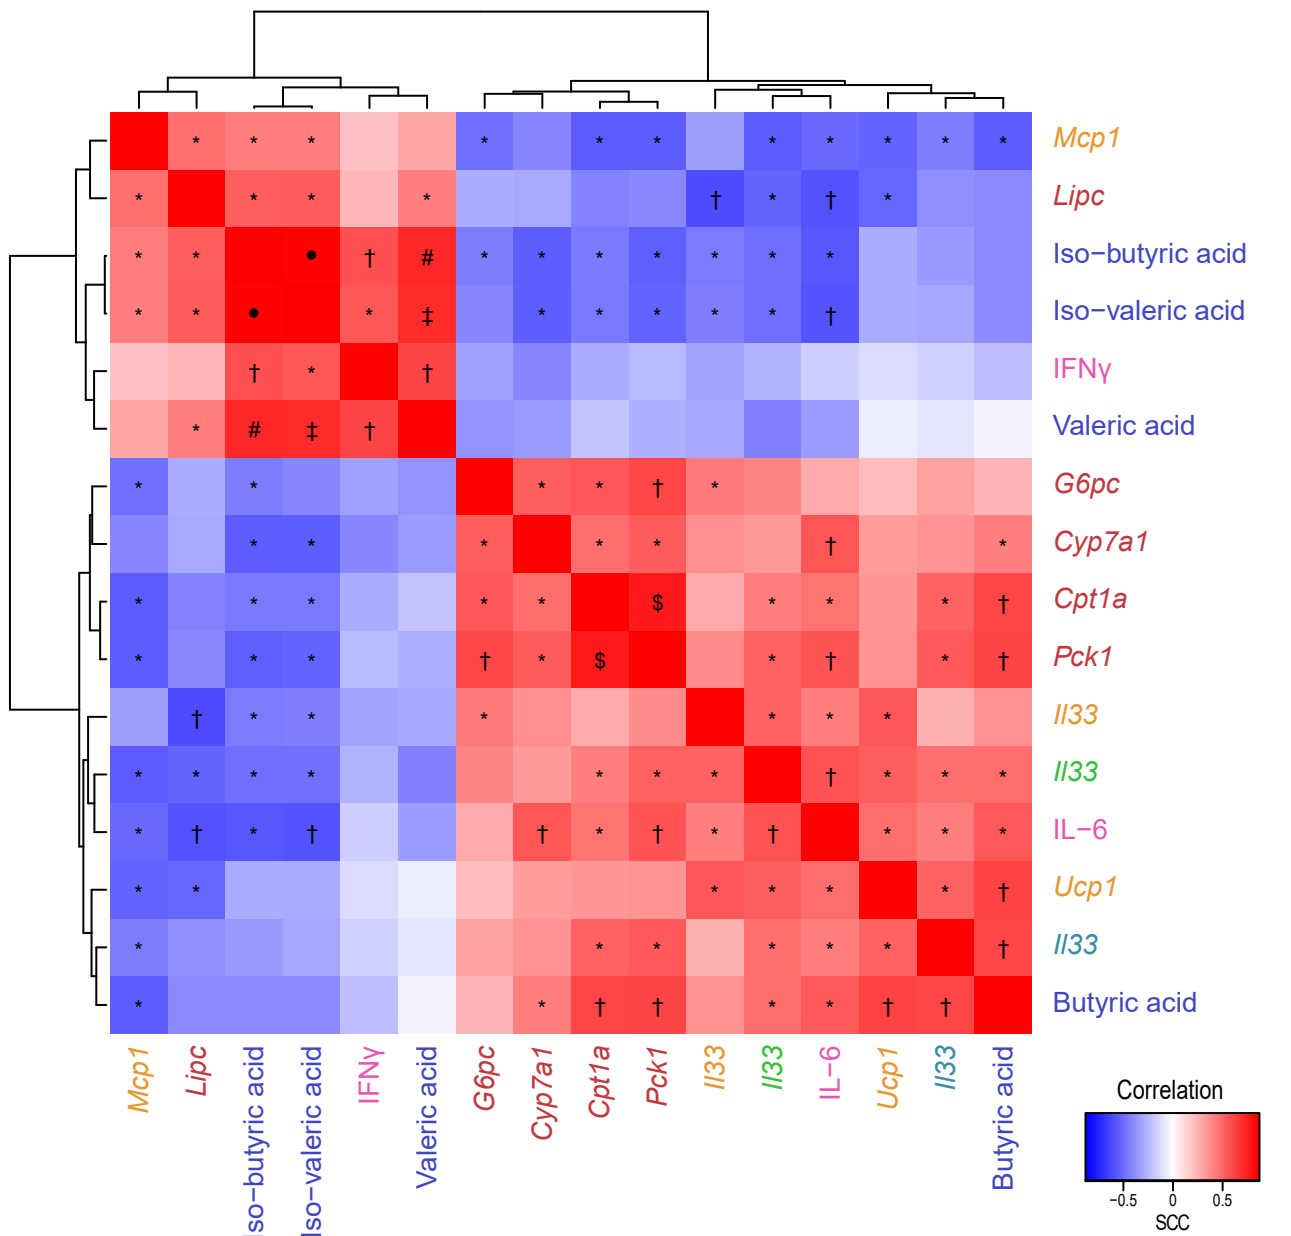

**Figure S5. Heatmap correlation analysis of all the fasting duration-associated host factors.**

Correlation analysis of the hierarchically clustered z-score of host factors (host factors displayed in Fig. 1B and 1C) based on Spearman's rho-values. \*, FDR < 0.05; †, FDR < 0.01; ‡, FDR < 0.001; #, q < 0.0001; \$, q < 0.00001; •, FDR < 0.000001. Colors indicate the tissue origin of the individual variable (see colored legend).

- Systemic
- Liver
- eWAT
- Ileum
- Cecum
- Colon
- Cecal SCFA

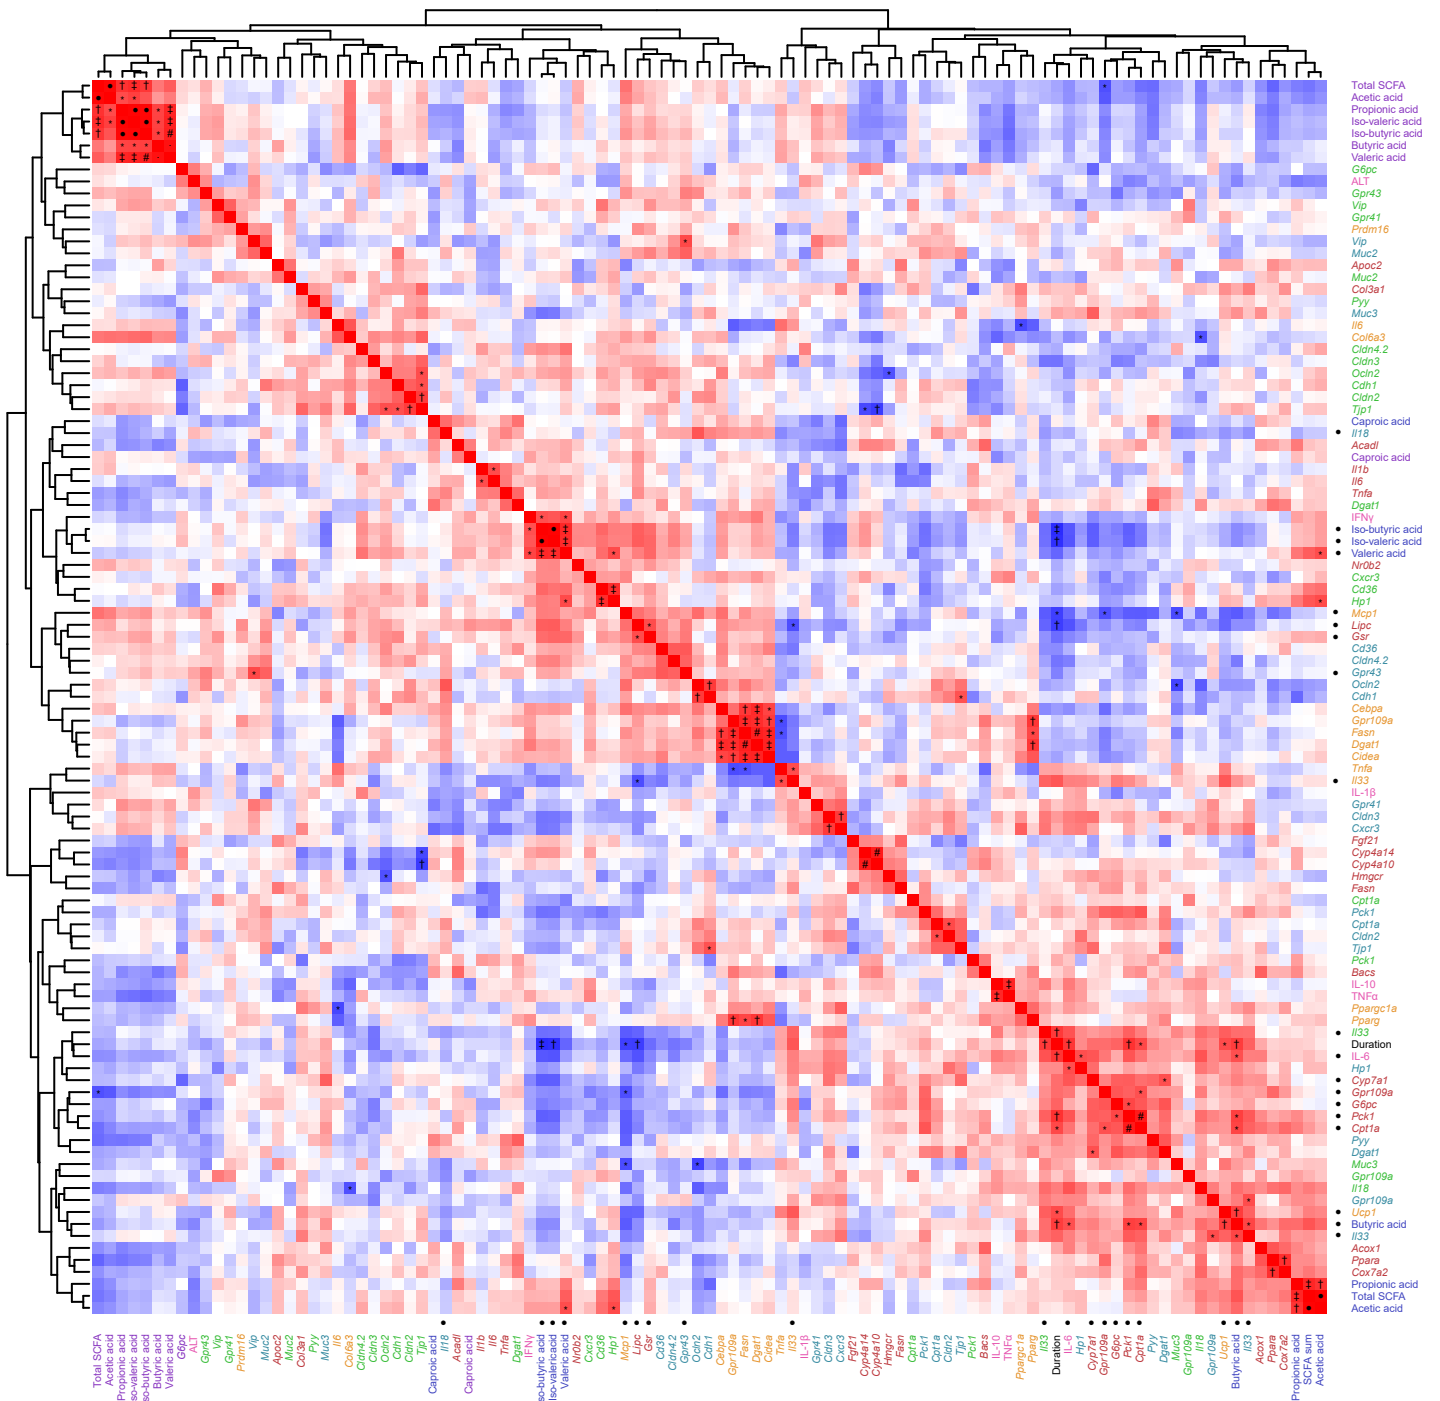

- Systemic
- Liver
- eWAT
- Ileum
- Colon
- Cecal SCFA
- Fecal SCFA

**Figure S6. Heatmap correlation analysis of all host-related factors.**

Correlation analysis of the hierarchically clustered z-scores of host factors (colored boxed in Fig. 1A) based on Spearman's rho-values. Spearman's correlation; \*, FDR < 0.05; †, FDR < 0.01; ‡, FDR < 0.001; #, q < 0.0001; \$, q < 0.00001; ●, FDR < 0.000001. Host factors that are significantly different between fed and feed deprived mice are represented by a ●. The color of the nodes indicates the tissue origin of the individual parameters (see colored legend).

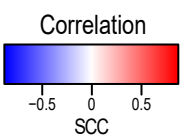



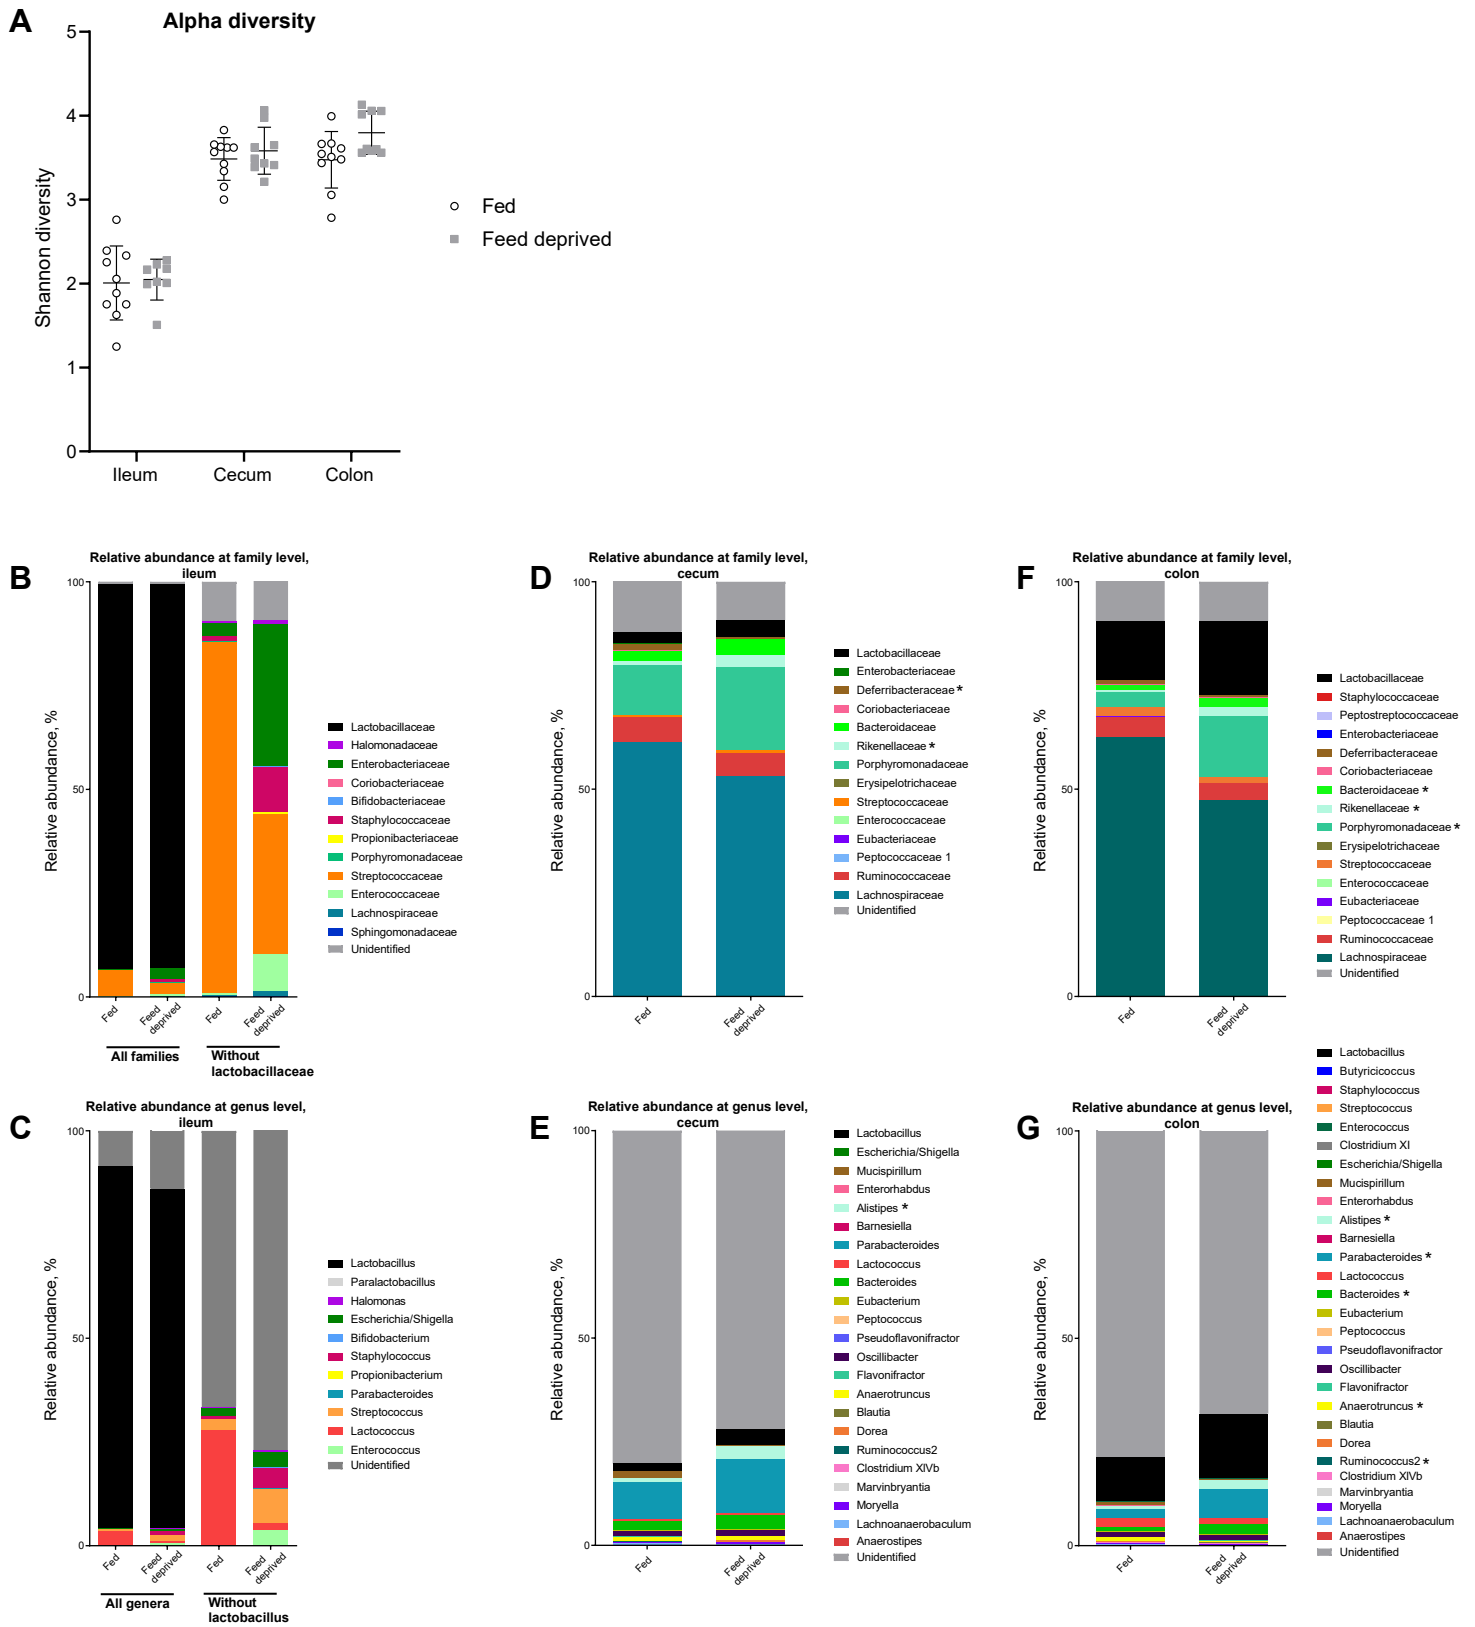

**Figure S7. Relative abundance at family and genus level of the ileal, cecal and colonic microbiota.**

Samples from fed (n=10) and feed deprived (n=8 for ileum, n=9 for cecum and colon) obese mice were subjected to 16s rRNA gene amplicon sequencing. Ileal, cecal and colonic  $\alpha$ -diversity of fed and feed deprived mice (A). Identified OTUs within ileum, cecum and colon were color-coded according to family (B, D, F), and genus (C, E, G). Statistical comparison of the two groups was done by permutation test (10,000 times). Asterisks represent fraction of times that permuted differences assessed by Welch's t-test were greater than or equal to real differences (\*, FDR < 0.05).

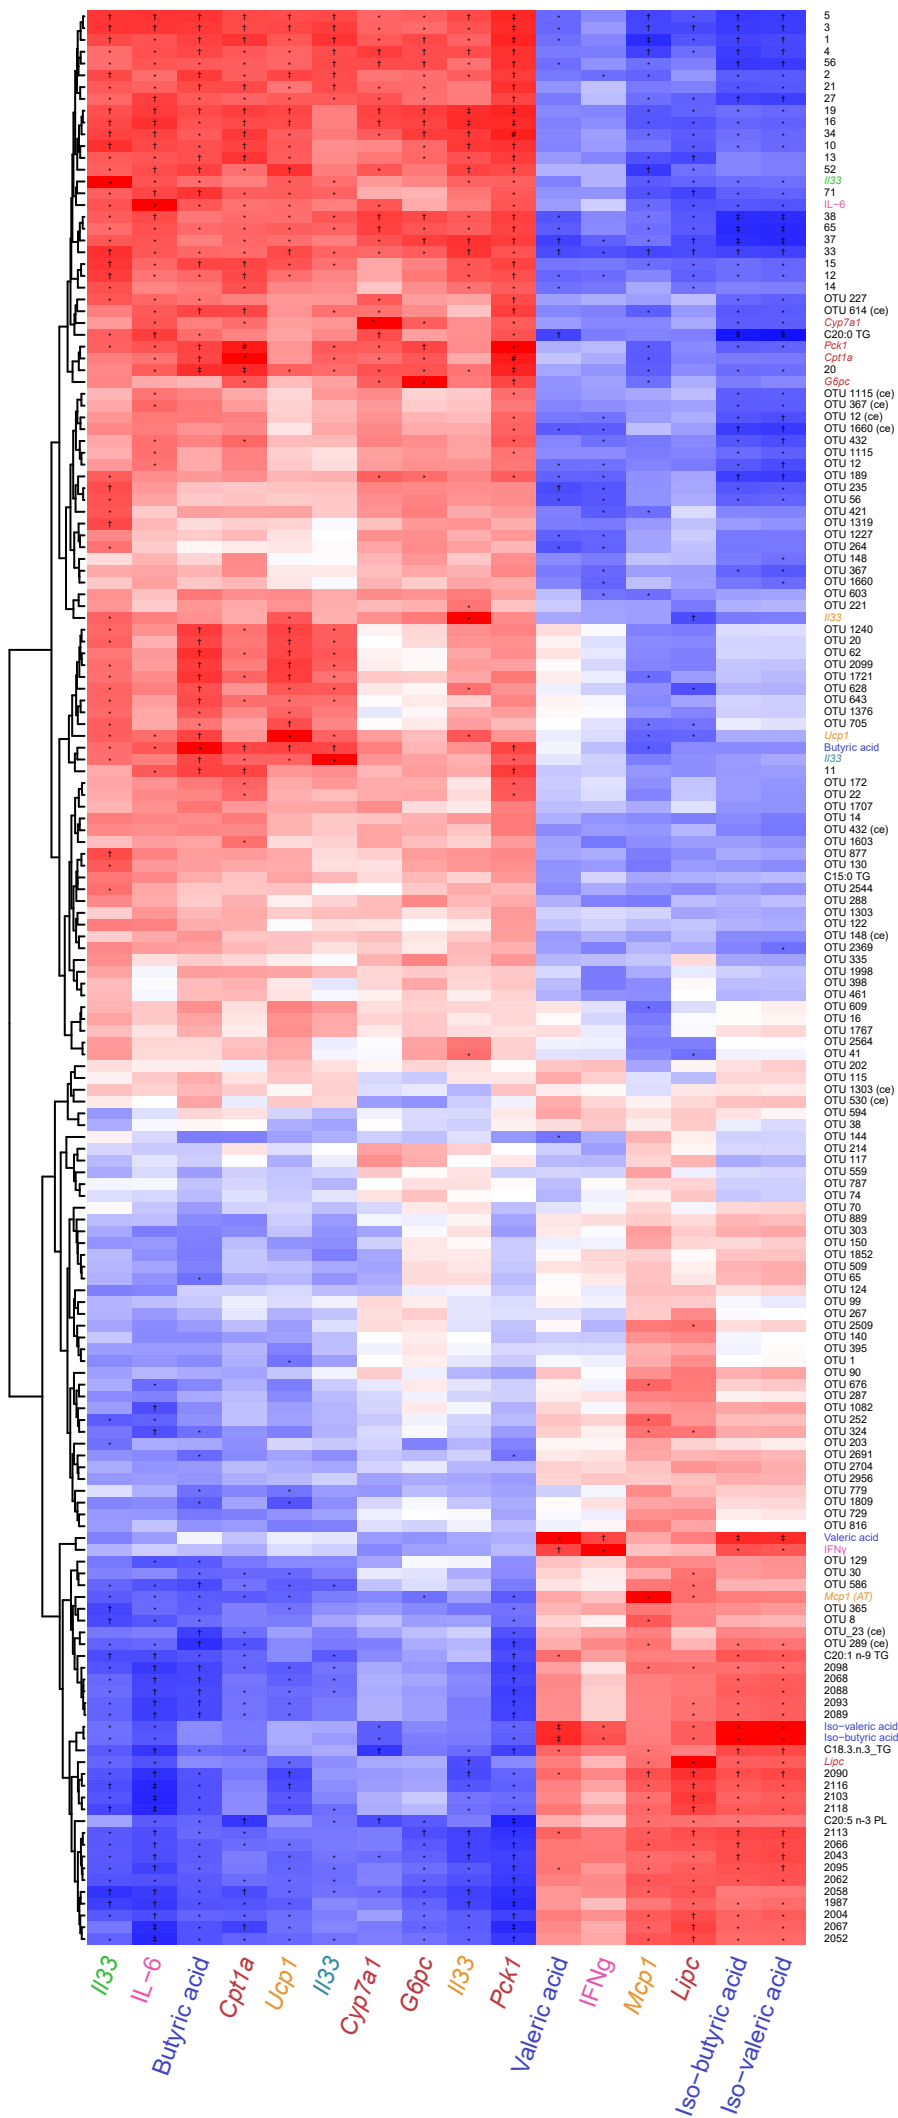

**Figure S8. Heatmap correlation analysis of filtered factors associated with duration of feed deprivation.**

Correlation analysis of hierarchically clustered, z-scored feed deprivation-dependent host factors (from Fig. 1B and 1C) versus the 43 metabolites, 100 OTUs and five liver lipids associated with duration of feed deprivation. Identifiers for the 43 metabolites, 100 OTUs and 5 lipids are shown in Table S2A-C. The heatmap color refers to Spearman's correlation coefficient (SCC); \*, FDR < 0.05; †, FDR < 0.01; ‡, FDR < 0.001; #, q < 0.0001. Colors of host factors indicate the tissue origin of the individual variable (see colored legend).

- Systemic
- Liver
- eWAT
- Ileum
- Colon
- Cecal SCFA
- Fecal SCFA

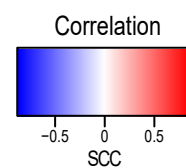

**Table S1. RT-qPCR primer sequences.**

| Gene                  | Forward primer         | Reverse primer          | Probe                                                |
|-----------------------|------------------------|-------------------------|------------------------------------------------------|
| <i>Ppara</i>          | TGCAACTTCTCAATGTAGCCT  | AATGCCTTAGAACTGGATGACA  | /56-FAM/AATTTGCTG/ZEN/TGGAGATCGGCCTGG/3IABkFQ/       |
| <i>Dgat1</i>          | CACCAGGATGCCATACTTGA   | TCTTTGTTGAGCTCAGACAGTG  | /56-FAM/AGCATCACC/ZEN/ACACACCAATTCAGGA/3IABkFQ/      |
| <i>Cd36</i>           | GTTCTGAAACATCTGGACTTGC | ACTGTACATCTTATGGTGTGCT  | /56-FAM/AGGCTTTCC/ZEN/TTCTTTGCATTTGCCA/3IABkFQ/      |
| <i>Ffar2/Gpr43</i>    | CTGTCCTCAGTCCAAAGCTG   | AGTGCTGGGATTACAGTTTC    | /56-FAM/AGCCACCTG/ZEN/CCAGAACTCCTTG/3IABkFQ/         |
| <i>Ffar3/Gpr41</i>    | AAGCCAGTAATTGCCAAGAAAG | GCAGCAGAGTGCCAGTT       | /56-FAM/CCCCATGGT/ZEN/CACAGATGCAGAGTAT/3IABkFQ/      |
| <i>Niacr1/Gpr109a</i> | GAGTAGATGTCACAGTTGCGT  | TCATTTGCTTCTACCCAGTG    | /56-FAM/AGAGAAGCC/ZEN/AGAAGATGCGGATGC/3IABkFQ/       |
| <i>Fgf21</i>          | GGGATGGGTCAGGTTCAGA    | CAGCCTTAGTGTCTTCTCAGC   | /56-FAM/TCAACACAG/ZEN/GAGAAACAGCCATTCCT/3IABkFQ/     |
| <i>Pyy</i>            | GTCGCTGTCGTCTGTGAAG    | CGCCACTACCTCAACCTG      | /56-FAM/CCCGCAGCT/ZEN/CTGTTCTCCAACT/3IABkFQ/         |
| <i>Vip</i>            | GAGTATCAGGAATGCCAGGAA  | GAAGTTCAGCACCTAGACAG    | /56-FAM/ACCGAGATG/ZEN/GAAGCCAGAAGCAA/3IABkFQ/        |
| <i>Il1b</i>           | CTCTTGTGATGTGCTGCTG    | GACCTGTTCTTTGAAGTTGACG  | /56-FAM/TTCCAAACC/ZEN/TTTGACCTGGGCTGT/3IABkFQ/       |
| <i>Il18</i>           | CACAGCCAGTCCTTACTTTC   | TCGTTGACAAAAGACAGCCT    | /56-FAM/TGCCAGTGA/ZEN/ACCCAGACCAG/3IABkFQ/           |
| <i>Il33</i>           | TCATGTTCCACATCAGCTTCT  | GTGCTACTACGCTACTATGAGTC | /56-FAM/ACCGTCGCC/ZEN/TGATTGACTTGCA/3IABkFQ/         |
| <i>Ucp1</i>           | CACACCTCCAGTCATTAAGCC  | CAAATCAGCTTTGCCTCACTC   | /56-FAM/AAACACCTG/ZEN/CCTCTCTCGAAACAA/3IABkFQ/       |
| <i>Prdm16</i>         | TCGCTCAATAGTCTTGTCTCAA | AGAAGTCCCATACACAACCG    | /56-FAM/TCGCAACAT/ZEN/GCTCAAGCCAAACC/3IABkFQ/        |
| <i>Cidea</i>          | GTAACCAGGCCAGTTGTGAT   | TCAAACCATGACCGAAGTAGC   | /56-FAM/AGACATCCA/ZEN/GAGTCTTGCTGATAAGTTCCT/3IABkFQ/ |
| <i>Ppargc1a</i>       | TCGCTCAATAGTCTTGTCTCAA | AGAAGTCCCATACACAACCG    | /56-FAM/TCGCAACAT/ZEN/GCTCAAGCCAAACC/3IABkFQ/        |

Forward, reverse and probe sequences for validated, predesigned TaqMan primer-probe pairs not included in Zhang et al, 2017<sup>11</sup>.

**Table S2. Identifiers for the duration of feed deprivation-dependent urine metabolites, intestinal OTUs and liver lipids.**

| OTU ID       | Tissue | Taxonomy†                   | Cluster     |
|--------------|--------|-----------------------------|-------------|
| OTU 1        | Colon  | <i>Lachnospiraceae</i>      | Colon-OTU-2 |
| OTU 8        | Colon  | <i>Lachnospiraceae</i>      | Colon-OTU-4 |
| OTU 12 (ce)  | Colon  | <i>Alistipes</i>            | Cecum-OTU-1 |
| OTU 12       | Cecum  | <i>Alistipes</i>            | Colon-OTU-3 |
| OTU 14       | Colon  | <i>Porphyromonadaceae</i>   | Colon-OTU-4 |
| OTU 16       | Colon  | <i>Peptococcus</i>          | Colon-OTU-4 |
| OTU 20       | Colon  | <i>Porphyromonadaceae</i>   | Colon-OTU-4 |
| OTU 22       | Colon  | <i>Bacteroides</i>          | Colon-OTU-3 |
| OTU 23 (ce)  | Cecum  | <i>Lachnospiraceae</i>      | Cecum-OTU-1 |
| OTU 30       | Colon  | <i>Anaerotruncus</i>        | Colon-OTU-2 |
| OTU 38       | Colon  | <i>Clostridiales</i>        | Colon-OTU-2 |
| OTU 41       | Colon  | <i>Oscillibacter</i>        | Colon-OTU-4 |
| OTU 56       | Ileum  | <i>Staphylococcus</i>       | Ileum-OTU-1 |
| OTU 62       | Colon  | <i>Porphyromonadaceae</i>   | Colon-OTU-4 |
| OTU 65       | Colon  | <i>Mucispirillum</i>        | Colon-OTU-1 |
| OTU 70       | Colon  | <i>Firmicutes</i>           | Colon-OTU-1 |
| OTU 74       | Colon  | <i>Lachnospiraceae</i>      | Colon-OTU-2 |
| OTU 90       | Colon  | <i>Butyricoccus</i>         | Colon-OTU-4 |
| OTU 99       | Colon  | <i>Coriobacteriaceae</i>    | Colon-OTU-2 |
| OTU 115      | Colon  | <i>Enterococcus</i>         | Colon-OTU-4 |
| OTU 117      | Colon  | <i>Lachnospiraceae</i>      | Colon-OTU-2 |
| OTU 122      | Colon  | <i>Firmicutes</i>           | Colon-OTU-4 |
| OTU 124      | Colon  | <i>Ruminococcaceae</i>      | Colon-OTU-1 |
| OTU 129      | Colon  | <i>Lachnospiraceae</i>      | Colon-OTU-2 |
| OTU 130      | Colon  | <i>Porphyromonadaceae</i>   | Colon-OTU-4 |
| OTU 140      | Colon  | <i>Clostridiales</i>        | Colon-OTU-2 |
| OTU 144      | Colon  | <i>Lachnoanaerobaculum</i>  | Colon-OTU-1 |
| OTU 148 (ce) | Cecum  | <i>Alistipes</i>            | Cecum-OTU-1 |
| OTU 148      | Colon  | <i>Alistipes</i>            | Colon-OTU-3 |
| OTU 150      | Colon  | <i>Mucispirillum</i>        | Colon-OTU-1 |
| OTU 172      | Colon  | <i>Bacteroides</i>          | Colon-OTU-3 |
| OTU 189      | Ileum  | <i>Enterococcus</i>         | Ileum-OTU-1 |
| OTU 202      | Colon  | <i>Escherichia/Shigella</i> | Colon-OTU-4 |
| OTU 203      | Colon  | <i>Ruminococcus2</i>        | Colon-OTU-4 |
| OTU 214      | Colon  | <i>Lachnospiraceae</i>      | Colon-OTU-2 |
| OTU 221      | Colon  | <i>Clostridiales</i>        | Colon-OTU-4 |
| OTU 227      | Ileum  | <i>Enterococcus</i>         | Ileum-OTU-1 |
| OTU 235      | Ileum  | <i>Staphylococcus</i>       | Ileum-OTU-1 |
| OTU 252      | Colon  | <i>Lachnospiraceae</i>      | Colon-OTU-2 |
| OTU 264      | Ileum  | <i>Staphylococcus</i>       | Ileum-OTU-1 |
| OTU 267      | Colon  | <i>Lachnospiraceae</i>      | Colon-OTU-2 |
| OTU 287      | Colon  | <i>Lachnospiraceae</i>      | Colon-OTU-2 |
| OTU 288      | Colon  | <i>Clostridium XI</i>       | Colon-OTU-4 |
| OTU 289 (ce) | Cecum  | <i>Lachnospiraceae</i>      | Cecum-OTU-1 |
| OTU 303      | Colon  | <i>Mucispirillum</i>        | Colon-OTU-1 |
| OTU 324      | Colon  | <i>Lachnospiraceae</i>      | Colon-OTU-2 |
| OTU 335      | Ileum  | <i>Lactococcus</i>          | Ileum-OTU-1 |
| OTU 365      | Colon  | <i>Lachnospiraceae</i>      | Colon-OTU-4 |
| OTU 367 (ce) | Cecum  | <i>Alistipes</i>            | Cecum-OTU-1 |
| OTU 367      | Colon  | <i>Alistipes</i>            | Colon-OTU-3 |
| OTU 395      | Colon  | <i>Clostridiales</i>        | Colon-OTU-2 |
| OTU 398      | Colon  | <i>Bacteria</i>             | Colon-OTU-3 |
| OTU 421      | Ileum  | <i>Enterococcus</i>         | Ileum-OTU-1 |
| OTU 432 (ce) | Cecum  | <i>Alistipes</i>            | Cecum-OTU-1 |
| OTU 432      | Colon  | <i>Alistipes</i>            | Colon-OTU-3 |
| OTU 461      | Colon  | <i>Bacteria</i>             | Colon-OTU-3 |
| OTU 509      | Colon  | <i>Mucispirillum</i>        | Colon-OTU-1 |
| OTU 530 (ce) | Cecum  | <i>Parabacteroides</i>      | Cecum-OTU-1 |
| OTU 559      | Colon  | <i>Lachnospiraceae</i>      | Colon-OTU-4 |
| OTU 586      | Colon  | <i>Lachnospiraceae</i>      | Colon-OTU-2 |
| OTU 594      | Colon  | <i>Clostridiales</i>        | Colon-OTU-2 |
| OTU 603      | Colon  | <i>Bacteria</i>             | Colon-OTU-4 |
| OTU 609      | Colon  | <i>Peptococcus</i>          | Colon-OTU-4 |

**A)** The 100 OTUs from any of the WGCNA clusters Ileum-OTU-1, Cecum-OTU-1 or Colon-OTU-1 to -4. The lowest taxonomical identification is noted in "Taxonomy".

|               |       |                           |             |
|---------------|-------|---------------------------|-------------|
| OTU 614 (ce)  | Cecum | <i>Alistipes</i>          | Cecum-OTU-1 |
| OTU 628       | Colon | <i>Bacteroidetes</i>      | Colon-OTU-4 |
| OTU 643       | Colon | <i>Bacteroidetes</i>      | Colon-OTU-4 |
| OTU 676       | Colon | <i>Lachnospiraceae</i>    | Colon-OTU-2 |
| OTU 705       | Colon | <i>Bacteroidetes</i>      | Colon-OTU-4 |
| OTU 729       | Colon | <i>Clostridiales</i>      | Colon-OTU-2 |
| OTU 779       | Colon | <i>Lachnospiraceae</i>    | Colon-OTU-1 |
| OTU 787       | Colon | <i>Clostridiales</i>      | Colon-OTU-2 |
| OTU 816       | Colon | <i>Lachnospiraceae</i>    | Colon-OTU-2 |
| OTU 877       | Colon | <i>Bacteroidales</i>      | Colon-OTU-4 |
| OTU 889       | Colon | <i>Anaerotruncus</i>      | Colon-OTU-2 |
| OTU 1082      | Colon | <i>Lachnospiraceae</i>    | Colon-OTU-2 |
| OTU 1115 (ce) | Cecum | <i>Alistipes</i>          | Cecum-OTU-1 |
| OTU 1115      | Colon | <i>Alistipes</i>          | Colon-OTU-3 |
| OTU 1227      | Ileum | <i>Staphylococcus</i>     | Ileum-OTU-1 |
| OTU 1240      | Colon | <i>Porphyromonadaceae</i> | Colon-OTU-4 |
| OTU 1303 (ce) | Cecum | <i>Parabacteroides</i>    | Cecum-OTU-1 |
| OTU 1303      | Colon | <i>Parabacteroides</i>    | Colon-OTU-3 |
| OTU 1319      | Ileum | <i>Staphylococcus</i>     | Ileum-OTU-1 |
| OTU 1376      | Colon | <i>Porphyromonadaceae</i> | Colon-OTU-4 |
| OTU 1603      | Colon | <i>Clostridiales</i>      | Colon-OTU-3 |
| OTU 1660 (ce) | Cecum | <i>Alistipes</i>          | Cecum-OTU-1 |
| OTU 1660      | Colon | <i>Alistipes</i>          | Colon-OTU-3 |
| OTU 1707      | Colon | <i>Bacteroides</i>        | Colon-OTU-3 |
| OTU 1721      | Colon | <i>Porphyromonadaceae</i> | Colon-OTU-4 |
| OTU 1767      | Colon | <i>Peptococcus</i>        | Colon-OTU-4 |
| OTU 1809      | Colon | <i>Lachnospiraceae</i>    | Colon-OTU-2 |
| OTU 1852      | Colon | <i>Mucispirillum</i>      | Colon-OTU-1 |
| OTU 1998      | Colon | <i>Bacteria</i>           | Colon-OTU-4 |
| OTU 2099      | Colon | <i>Bacteroidetes</i>      | Colon-OTU-4 |
| OTU 2369      | Colon | <i>Porphyromonadaceae</i> | Colon-OTU-4 |
| OTU 2509      | Colon | <i>Oscillibacter</i>      | Colon-OTU-2 |
| OTU 2544      | Colon | <i>Porphyromonadaceae</i> | Colon-OTU-4 |
| OTU 2564      | Colon | <i>Oscillibacter</i>      | Colon-OTU-4 |
| OTU 2691      | Colon | <i>Lachnospiraceae</i>    | Colon-OTU-4 |
| OTU 2704      | Colon | <i>Lachnospiraceae</i>    | Colon-OTU-2 |
| OTU 2956      | Colon | <i>Lachnospiraceae</i>    | Colon-OTU-4 |

‡ The lowest identified taxonomic level is shown, if classification at family-level was not possible.

**Table S2. Identifiers for the duration of feed deprivation-dependent urine metabolites, intestinal OTUs and liver lipids.**

| ID   | Name                                                       | m/z ratio | rt (sec) | Ion                      | Database | ID level | Log2 fold change | Cluster |
|------|------------------------------------------------------------|-----------|----------|--------------------------|----------|----------|------------------|---------|
| 16   | Unknown                                                    | 544.9673  | 37       |                          |          | 4        | 2.52             | Me-3    |
| 19   | Unknown                                                    | 321.9758  | 37       |                          |          | 4        | 2.25             | Me-3    |
| 34   | Unknown                                                    | 446.9905  | 37       |                          |          | 4        | 2.13             | Me-3    |
| 52   | Unknown                                                    | 196.9611  | 38       |                          |          | 4        | 2.08             | Me-8    |
| 37   | Unknown                                                    | 540.0867  | 39       |                          |          | 4        | 2.3              | Me-5    |
| 2004 | Disaccharide                                               | 381.0793  | 42       | [M+K]                    | HMDB     | 3        | -2.06            | Me-5    |
| 2103 | Dipeptide - Prolyl-glutamine                               | 244.1291  | 42       | [M+H]                    | HMDB     | 4        | -2.95            | Me-6    |
| 2066 | Disaccharide                                               | 360.1500  | 42       | [M+NH4]                  | HMDB     | 4        | -3.01            | Me-5    |
| 2062 | Disaccharide (isotope of 2066)                             | 361.1531  | 43       | [M+NH4]                  | HMDB     | 4        | -2.83            | Me-5    |
| 2113 | Disaccharide fragment                                      | 307.1019  | 43       | [M+H]                    | HMDB     | 4        | -3.6             | Me-5    |
| 2043 | Disaccharide fragment                                      | 289.0919  | 43       | [M+H]                    | HMDB     | 4        | -2.46            | Me-5    |
| 2118 | Dipeptide fragment                                         | 217.1174  | 43       | [M+H]                    | METLIN   | 4        | -6.18            | Me-6    |
| 21   | Unknown                                                    | 159.0287  | 49       |                          |          | 4        | 2.67             | Me-11   |
| 71   | Gluconolactone, Galactonolactone or Gulonolactone fragment | 161.0444  | 65       | [M+H-H2O]                | HMDB     | 3        | 2.04             | Me-6    |
| 33   | Gluconolactone, Galactonolactone or Gulonolactone          | 196.0813  | 66       | [M+NH4]                  | HMDB     | 3        | 2.26             | Me-6    |
| 2    | Unknown                                                    | 226.1284  | 78       |                          |          | 4        | 8.26             | Me-6    |
| 4    | Unknown                                                    | 328.1231  | 80       |                          |          | 4        | 5.19             | Me-11   |
| 2058 | Hydroxybutyrylcarnitine                                    | 248.1490  | 82       | [M+H]                    | HMDB     | 3        | -2.03            | Me-3    |
| 1987 | Unknown                                                    | 297.1443  | 122      |                          |          | 4        | -2.06            | Me-4    |
| 2090 | Unknown                                                    | 255.1634  | 161      |                          |          | 4        | -2.83            | Me-6    |
| 2116 | Dipeptide fragment                                         | 254.1609  | 161      | [M+H-H2O] or [M+NH4-H2O] | HMDB     | 4        | -4.96            | Me-6    |
| 56   | Unknown                                                    | 266.1054  | 177      |                          |          | 4        | 2.28             | Me-11   |
| 11   | Unknown                                                    | 516.7704  | 211      |                          |          | 4        | 2.58             | Me-4    |
| 65   | Unknown                                                    | 232.1000  | 259      |                          |          | 4        | 2.06             | Me-11   |
| 27   | Unknown (isotope of 38)                                    | 271.0800  | 262      |                          |          | 4        | 2.16             | Me-11   |
| 38   | Unknown                                                    | 270.0771  | 262      |                          |          | 4        | 2.21             | Me-11   |
| 5    | Unknown                                                    | 524.1183  | 291      |                          |          | 4        | 4.82             | Me-6    |
| 20   | Unknown                                                    | 473.2967  | 301      |                          |          | 4        | 2.53             | Me-11   |
| 2067 | Unknown                                                    | 307.1174  | 313      |                          |          | 4        | -2.28            | Me-4    |
| 2052 | Unknown                                                    | 360.1652  | 313      |                          |          | 4        | -2.1             | Me-4    |
| 10   | Tetrahydrocortisone isotope or Dihydrocortisol isotope     | 366.2352  | 314      | [M+H]                    | HMDB     | 3        | 2.78             | Me-1    |
| 15   | Tetrahydrocortisone or Dihydrocortisol                     | 365.2320  | 314      | [M+H]                    | HMDB     | 3        | 2.72             | Me-1    |
| 2095 | Unknown                                                    | 490.1740  | 318      |                          |          | 4        | -2.75            | Me-4    |
| 13   | 18-Hydroxycortisol or 6-beta-hydroxycortisol               | 379.2113  | 319      | [M+H]                    | HMDB     | 3        | 2.84             | Me-3    |
| 1    | Hydroxysanguinarine                                        | 348.0866  | 340      | [M+H]                    | METLIN   | 3        | 9.74             | Me-6    |
| 3    | Hydroxysanguinarine isotope                                | 349.0898  | 341      | [M+H]                    | METLIN   | 3        | 7.32             | Me-6    |
| 2068 | O-glycosyl compound fragment (isotope of 2093)             | 375.1841  | 351      | [M+NH4]                  | HMDB     | 4        | -2.98            | Me-4    |
| 2088 | O-glycosyl compound fragment                               | 379.1362  | 351      | [M+Na]                   | HMDB     | 4        | -2.86            | Me-4    |
| 2098 | O-glycosyl compound fragment                               | 417.1867  | 351      | [M+H]                    | HMDB     | 4        | -3.39            | Me-4    |
| 2093 | O-glycosyl compound fragment                               | 374.1809  | 351      | [M+NH4]                  | HMDB     | 4        | -3.28            | Me-4    |
| 2089 | O-glycosyl compound fragment                               | 321.1331  | 351      | [M+H]                    | HMDB     | 4        | -3.38            | Me-4    |
| 14   | Cortisol or 18-Hydroxycorticosterone                       | 363.2166  | 374      | [M+H]                    | HMDB     | 3        | 2.53             | Me-1    |
| 12   | Cortisol isotope or 18-Hydroxycorticosterone isotope       | 364.2200  | 374      | [M+H]                    | HMDB     | 3        | 2.68             | Me-1    |

**B)** The 43 metabolites putatively annotated using m/z ratios using databases from either METLIN or HMDB. Metabolites that could not be annotated are named “Unknown / noise” and for some metabolites the database search resulted in several likely candidates.

**Table S2. Identifiers for the duration of feed deprivation-dependent urine metabolites, intestinal OTUs and liver lipids.**

| <b>ID</b>         | <b>Type</b>  | <b>Cluster</b> |
|-------------------|--------------|----------------|
| C20:5 <i>n</i> -3 | Phospholipid | Lipids-1       |
| C18:3 <i>n</i> -3 | Triglyceride | Lipids-1       |
| C20:1 <i>n</i> -9 | Triglyceride | Lipids-1       |
| C20:0             | Triglyceride | Lipids-1       |
| C15:0             | Triglyceride | Lipids-1       |

**C)** The five liver lipids from the Lipids-1 cluster.

**Table S3. *But* and *Buk* enzymes in bacterial families.**

| Family                       | Total taxIDs | taxIDs with hits | TaxIDs with BUK pathway | TaxIDs with BUT pathway | TaxIDs with either BUT or BUK pathway | % BUK of total | % BUT of total | % BUT/BUK of total | % BUK of hits | % BUT of hits | % BUT/BUK of hits |
|------------------------------|--------------|------------------|-------------------------|-------------------------|---------------------------------------|----------------|----------------|--------------------|---------------|---------------|-------------------|
| <i>Bacteroidaceae</i>        | 882          | 132              | 79                      | 0                       | 79                                    | 9.0%           | 0.0%           | 9.0%               | 59.8%         | 0.0%          | 59.8%             |
| <i>Coriobacteriaceae</i>     | 125          | 23               | 11                      | 0                       | 11                                    | 8.8%           | 0.0%           | 8.8%               | 47.8%         | 0.0%          | 47.8%             |
| <i>Deferribacteraceae</i>    | 76           | 6                | 4                       | 0                       | 4                                     | 5.3%           | 0.0%           | 5.3%               | 66.7%         | 0.0%          | 66.7%             |
| <i>Enterobacteriaceae</i>    | 19011        | 512              | 196                     | 0                       | 196                                   | 1.0%           | 0.0%           | 1.0%               | 38.3%         | 0.0%          | 38.3%             |
| <i>Enterococcaceae</i>       | 2756         | 75               | 52                      | 0                       | 52                                    | 1.9%           | 0.0%           | 1.9%               | 69.3%         | 0.0%          | 69.3%             |
| <i>Lachnospiraceae</i>       | 1463         | 286              | 175                     | 80                      | 201                                   | 12.0%          | 5.5%           | 13.7%              | 61.2%         | 28.0%         | 70.3%             |
| <i>Peptococcaceae</i>        | 597          | 72               | 43                      | 3                       | 43                                    | 7.2%           | 0.5%           | 7.2%               | 59.7%         | 4.2%          | 59.7%             |
| <i>Peptostreptococcaceae</i> | 651          | 89               | 41                      | 5                       | 42                                    | 6.3%           | 0.8%           | 6.5%               | 46.1%         | 5.6%          | 47.2%             |
| <i>Porphyromonadaceae</i>    | 448          | 52               | 26                      | 0                       | 26                                    | 5.8%           | 0.0%           | 5.8%               | 50.0%         | 0.0%          | 50.0%             |
| <i>Rikenellaceae</i>         | 107          | 31               | 24                      | 0                       | 24                                    | 22.4%          | 0.0%           | 22.4%              | 77.4%         | 0.0%          | 77.4%             |
| <i>Ruminococcaceae</i>       | 741          | 110              | 59                      | 12                      | 65                                    | 8.0%           | 1.6%           | 8.8%               | 53.6%         | 10.9%         | 59.1%             |
| <i>Staphylococcaceae</i>     | 8884         | 117              | 60                      | 0                       | 60                                    | 0.7%           | 0.0%           | 0.7%               | 51.3%         | 0.0%          | 51.3%             |
| <i>Streptococcaceae</i>      | 4246         | 215              | 87                      | 0                       | 87                                    | 2.0%           | 0.0%           | 2.0%               | 40.5%         | 0.0%          | 40.5%             |

The presence or absence of enzymes of the butyrate kinase (*Buk*) or butyrate transferase (*But*) pathway of bacterial families to which the OTUs in the clusters associated with feed deprivation belong.
